# Supplementary material for: Genetic background of high blood pressure is associated with reduced mortality in premature neonates
Source: PubMed Central journal article supplement — Arch Dis Child Fetal Neonatal Ed. 2019 Jun 14;105(2):184–9. doi: 10.1136/archdischild-2019-317131 (PMC7063394; doi:10.1136/archdischild-2019-317131), 2019-06-14
Supplement: fetalneonatal-2019-317131supp002.pdf [file fetalneonatal-2019-317131supp002.pdf]

| rsID        | Effect allele | Non-effect allele | SBP-beta in adults | DBP-beta in adults | EAF in adults | EAF in preterm infants |
|-------------|---------------|-------------------|--------------------|--------------------|---------------|------------------------|
| rs10057188  | A             | G                 | -0.2396            | -0.0855            | 0.4504        | 0.497                  |
| rs10059921  | T             | G                 | -0.4173            | -0.2802            | 0.0804        | 0.08                   |
| rs10078021  | T             | G                 | -0.0474            | -0.1051            | 0.6251        | 0.6485                 |
| rs1008058   | A             | G                 | 0.256116           | 0.185098           | 0.116406871   | 0.1145                 |
| rs10164833  | G             | C                 | 0.0167674          | 0.0529545          | 0.780216256   | 0.797                  |
| rs10224002  | G             | A                 | 0.423253           | 0.216886           | 0.288837467   | 0.286                  |
| rs10260816  | G             | C                 | -0.349578          | 0.193476           | 0.438800202   | 0.4415                 |
| rs1036477   | G             | A                 | -0.614259          | 0.0648865          | 0.101532264   | 0.1065                 |
| rs1060105   | T             | C                 | -0.172343          | -0.203124          | 0.2019456     | 0.2075                 |
| rs1063281   | T             | C                 | -0.2631            | -0.1716            | 0.6024        | 0.6075                 |
| rs10760117  | G             | T                 | -0.212257          | -0.0744702         | 0.583818373   | 0.6075                 |
| rs10826995  | T             | C                 | -0.1117            | 0.0129             | 0.7268        | 0.722                  |
| rs10922502  | A             | G                 | -0.3068            | -0.1632            | 0.6458        | 0.6305                 |
| rs10943605  | A             | G                 | 0.356031           | 0.260324           | 0.48779617    | 0.498                  |
| rs10948071  | T             | C                 | -0.214771          | -0.0992519         | 0.609818068   | 0.5785                 |
| rs10995311  | G             | C                 | -0.422986          | -0.239827          | 0.445479195   | 0.403                  |
| rs11030119  | A             | G                 | -0.1929            | -0.1194            | 0.2936        | 0.2745                 |
| rs110419    | G             | A                 | -0.109862          | -0.1184            | 0.530440369   | 0.5095                 |
| rs11084240  | T             | C                 | 0.192              | 0.2344             | 0.922         | 0.9205                 |
| rs111245230 | C             | T                 | 0.86886            | 0.413153           | 0.035128689   | 0.039                  |
| rs11128722  | A             | G                 | -0.20844           | -0.115395          | 0.570480615   | 0.565                  |
| rs11154027  | T             | C                 | 0.0513             | -0.0688            | 0.4408        | 0.4355                 |
| rs11191548  | C             | T                 | -1.324             | -0.592728          | 0.075950086   | 0.098                  |
| rs112184198 | A             | G                 | -0.5318            | -0.2455            | 0.1058        | 0.114                  |
| rs11222084  | T             | A                 | 0.389748           | -0.226511          | 0.370533496   | 0.355                  |
| rs11229457  | T             | C                 | -0.468781          | -0.181679          | 0.212120782   | 0.214                  |
| rs112557609 | A             | G                 | 0.2927             | 0.0825             | 0.3381        | 0.35                   |
| rs1126464   | C             | G                 | 0.0679082          | 0.151907           | 0.240871793   | 0.231                  |
| rs11537751  | T             | C                 | 0.344505           | 0.137743           | 0.056799012   | 0.0455                 |
| rs11556924  | T             | C                 | -0.183467          | -0.21449           | 0.389148365   | 0.3855                 |
| rs11639856  | A             | T                 | -0.391694          | -0.162561          | 0.195525333   | 0.1865                 |

|             |   |   |           |            |             |        |
|-------------|---|---|-----------|------------|-------------|--------|
| rs11643209  | T | G | -0.2216   | -0.0791    | 0.459       | 0.4115 |
| rs11689667  | T | C | 0.1056    | -0.0277    | 0.5548      | 0.5595 |
| rs11690961  | A | C | 0.0621    | -0.1981    | 0.887       | 0.8975 |
| rs117006983 | A | G | 0.6954    | -0.1711    | 0.0334      | 0.0115 |
| rs11719057  | C | G | -0.1969   | -0.1162    | 0.3562      | 0.365  |
| rs1173771   | G | A | 0.737785  | 0.323915   | 0.60133658  | 0.591  |
| rs12374077  | C | G | 0.1327    | 0.1272     | 0.3464      | 0.367  |
| rs12405515  | T | G | -0.0314   | -0.118     | 0.5731      | 0.575  |
| rs12408022  | T | C | 0.2274    | 0.1721     | 0.2629      | 0.2675 |
| rs1250259   | A | T | -0.2457   | -0.0342    | 0.7387      | 0.7315 |
| rs12521868  | T | G | 0.0377962 | -0.0902427 | 0.42833719  | 0.3955 |
| rs12627651  | A | G | 0.246549  | 0.144417   | 0.28234267  | 0.272  |
| rs12628032  | T | C | 0.2675    | 0.057      | 0.3236      | 0.311  |
| rs12731740  | T | C | -0.1218   | 0.1016     | 0.1181      | 0.1165 |
| rs1275988   | T | C | -0.550967 | -0.270543  | 0.615451229 | 0.618  |
| rs12906962  | T | C | -0.2631   | -0.1551    | 0.672       | 0.659  |
| rs12921187  | T | G | -0.2341   | -0.1467    | 0.4208      | 0.4275 |
| rs12940887  | T | C | 0.241631  | 0.18101    | 0.362980367 | 0.355  |
| rs12941318  | T | C | -0.2263   | -0.096     | 0.4952      | 0.4795 |
| rs12946454  | T | A | 0.430148  | 0.192238   | 0.268093156 | 0.2655 |
| rs12958173  | C | A | -0.32563  | -0.177854  | 0.705331057 | 0.7    |
| rs13082711  | C | T | 0.270467  | 0.171669   | 0.243618773 | 0.224  |
| rs13107325  | T | C | -0.751388 | -0.668255  | 0.075016681 | 0.0655 |
| rs13112725  | C | G | 0.4501    | 0.2578     | 0.7676      | 0.766  |
| rs13139571  | A | C | -0.410025 | -0.313775  | 0.233695575 | 0.24   |
| rs13205180  | T | C | 0.0361    | 0.1232     | 0.4841      | 0.4935 |
| rs13209747  | T | C | 0.591832  | 0.328076   | 0.437769552 | 0.4545 |
| rs1322639   | A | G | 0.1574    | -0.1036    | 0.7694      | 0.785  |
| rs13238550  | A | G | 0.2117    | 0.1136     | 0.3971      | 0.385  |
| rs1327235   | G | A | 0.359196  | 0.25765    | 0.477310799 | 0.461  |
| rs13333226  | G | A | -0.365994 | -0.345143  | 0.182890646 | 0.178  |
| rs13359291  | A | G | 0.455211  | 0.293887   | 0.149951733 | 0.154  |
| rs13420463  | A | G | 0.2441    | 0.0847     | 0.7752      | 0.779  |

|             |   |   |           |             |             |        |
|-------------|---|---|-----------|-------------|-------------|--------|
| rs1344653   | G | A | 0.339278  | -0.046404   | 0.499992547 | 0.5175 |
| rs1378942   | A | C | -0.535678 | -0.432687   | 0.67765222  | 0.5065 |
| rs138643143 | A | G | 0.4304    | 0.0412      | 0.0485      | 0.058  |
| rs143112823 | A | G | -0.5601   | -0.2948     | 0.073       | 0.086  |
| rs1438896   | T | C | 0.2707    | 0.1865      | 0.3039      | 0.3145 |
| rs1458038   | T | C | 0.994191  | 0.560607    | 0.291183402 | 0.3105 |
| rs1530440   | T | C | -0.693345 | -0.463388   | 0.186507148 | 0.185  |
| rs1563788   | T | C | 0.308038  | 0.105707    | 0.280658636 | 0.31   |
| rs1566497   | A | C | 0.0993    | -0.06       | 0.4109      | 0.417  |
| rs167479    | T | G | -0.675064 | -0.389489   | 0.47215755  | 0.491  |
| rs16823124  | A | G | 0.172011  | 0.245305    | 0.309249585 | 0.3005 |
| rs16833934  | G | A | 0.0843713 | -0.00164343 | 0.269198691 | 0.2165 |
| rs16849225  | T | C | -0.392625 | -0.0743433  | 0.2406553   | 0.2165 |
| rs16851397  | G | A | 0.445703  | 0.330477    | 0.047022696 | 0.0415 |
| rs17010957  | C | T | 0.320708  | 0.0607271   | 0.149534104 | 0.1375 |
| rs17030613  | C | A | 0.516119  | 0.411936    | 0.203006772 | 0.2015 |
| rs17059668  | C | G | -0.2019   | 0.077       | 0.9222      | 0.933  |
| rs17080102  | C | G | -0.790247 | -0.508927   | 0.06994419  | 0.0565 |
| rs17249754  | A | G | -0.842269 | -0.394326   | 0.170933831 | 0.157  |
| rs17477177  | C | T | 0.910665  | -0.0832514  | 0.198861459 | 0.204  |
| rs17608766  | C | T | 0.821521  | 0.195549    | 0.146629804 | 0.129  |
| rs17638167  | T | C | -0.298807 | -0.186469   | 0.041453131 | 0.044  |
| rs1799945   | G | C | 0.524919  | 0.413209    | 0.149951733 | 0.1485 |
| rs1813353   | C | T | -0.646935 | -0.354429   | 0.334436858 | 0.3625 |
| rs1886773   | A | G | -0.3543   | 0.1299      | 0.0439      | 0.039  |
| rs1925153   | T | C | -0.147755 | 0.0899907   | 0.44988611  | 0.4365 |
| rs1953126   | C | T | -0.136611 | 0.0414429   | 0.648138158 | 0.654  |
| rs1975487   | G | A | 0.148816  | 0.0895412   | 0.523250664 | 0.5425 |
| rs2004776   | T | C | 0.382914  | 0.233104    | 0.240477276 | 0.24   |
| rs2014408   | T | C | 0.475639  | 0.295008    | 0.211963203 | 0.2    |
| rs2071518   | T | C | 0.372302  | -0.199995   | 0.263365795 | 0.2555 |
| rs2107595   | A | G | 0.479332  | -0.0804341  | 0.153233451 | 0.158  |
| rs217727    | A | G | 0.439479  | 0.17692     | 0.181997113 | 0.2075 |

|            |   |   |           |            |             |        |
|------------|---|---|-----------|------------|-------------|--------|
| rs2240736  | T | C | 0.34834   | 0.145481   | 0.735365767 | 0.634  |
| rs2270860  | T | C | 0.290385  | 0.100829   | 0.292933093 | 0.323  |
| rs2282978  | C | T | -0.448983 | 0.00484285 | 0.324966994 | 0.3425 |
| rs2289081  | C | G | -0.1263   | 0.076      | 0.3657      | 0.3705 |
| rs2289125  | A | C | -0.1581   | 0.1344     | 0.2308      | 0.2185 |
| rs2291435  | T | C | -0.295204 | -0.106903  | 0.539460329 | 0.545  |
| rs2302061  | C | G | 0.23424   | -0.0500163 | 0.123869621 | 0.116  |
| rs2304130  | G | A | 0.154366  | 0.150935   | 0.084240712 | 0.076  |
| rs2306374  | T | C | -0.2313   | -0.1545    | 0.844       | 0.834  |
| rs2467099  | T | C | -0.2162   | -0.0711    | 0.2158      | 0.219  |
| rs2493292  | T | C | 0.303541  | 0.185354   | 0.13989367  | 0.128  |
| rs2521501  | T | A | 0.73719   | 0.372526   | 0.322813293 | 0.5035 |
| rs2760061  | A | T | 0.2892    | 0.2245     | 0.4727      | 0.509  |
| rs2782980  | C | T | 0.361888  | 0.305199   | 0.720022785 | 0.7075 |
| rs2854275  | A | C | -0.149172 | -0.412237  | 0.146004233 | 0.115  |
| rs2898290  | C | T | -0.358636 | -0.16728   | 0.527666436 | 0.5265 |
| rs2932538  | G | A | 0.380584  | 0.304108   | 0.744222115 | 0.7255 |
| rs2969070  | A | G | -0.272432 | -0.154526  | 0.628478798 | 0.643  |
| rs2972146  | T | G | 0.165733  | 0.076686   | 0.646768217 | 0.627  |
| rs2978098  | A | C | 0.1623    | 0.1215     | 0.5626      | 0.5445 |
| rs2978456  | T | C | -0.1884   | -0.0648    | 0.5555      | 0.559  |
| rs3184504  | C | T | -0.597525 | -0.532     | 0.516598998 | 0.5015 |
| rs319690   | C | T | -0.356888 | -0.263563  | 0.304141764 | 0.4175 |
| rs33063    | G | A | -0.247251 | 0.0445454  | 0.847540886 | 0.866  |
| rs34591516 | T | C | 0.529147  | 0.365843   | 0.046120157 | 0.0515 |
| rs347591   | T | G | 0.373337  | 0.148323   | 0.661068483 | 0.66   |
| rs34923683 | A | C | 0.3459    | -0.1014    | 0.0219      | 0.021  |
| rs35199222 | A | G | 0.2979    | 0.1683     | 0.4391      | 0.446  |
| rs35479618 | A | G | 1.451     | 0.815828   | 0.017074573 | 0.009  |
| rs3741378  | T | C | -0.426811 | -0.23014   | 0.13707216  | 0.1285 |
| rs3771371  | T | C | -0.1771   | -0.0517    | 0.5045      | 0.5865 |
| rs3774372  | C | T | -0.434928 | 0.315361   | 0.159051547 | 0.17   |
| rs381815   | T | C | 0.249563  | 0.104942   | 0.278346418 | 0.2815 |

|            |   |   |            |            |             |        |
|------------|---|---|------------|------------|-------------|--------|
| rs3820068  | A | G | 0.3666     | 0.1801     | 0.7978      | 0.815  |
| rs3889199  | A | G | 0.2329     | -0.0664    | 0.7113      | 0.732  |
| rs3918226  | T | C | 0.869127   | 0.674368   | 0.081427122 | 0.0795 |
| rs419076   | C | T | -0.444502  | -0.315875  | 0.526653511 | 0.525  |
| rs4245739  | A | C | 0.0749155  | 0.137021   | 0.723630414 | 0.741  |
| rs4247374  | T | C | -0.769531  | -0.401125  | 0.142424156 | 0.1465 |
| rs4308     | A | G | 0.256      | 0.1862     | 0.3793      | 0.375  |
| rs4360494  | C | G | 0.1471     | -0.0743    | 0.549       | 0.5505 |
| rs4364717  | A | G | -0.1246    | -0.1362    | 0.5387      | 0.543  |
| rs4373814  | C | G | 0.506873   | 0.232869   | 0.417569313 | 0.4385 |
| rs4387287  | C | A | -0.330638  | -0.169602  | 0.84363155  | 0.819  |
| rs4454254  | A | G | -0.2267    | -0.0244    | 0.6351      | 0.627  |
| rs4494250  | A | G | 0.365084   | 0.216617   | 0.362535668 | 0.337  |
| rs449789   | C | G | 0.2589     | -0.0194    | 0.1349      | 0.135  |
| rs4511593  | T | C | -0.2578    | -0.1401    | 0.6504      | 0.6485 |
| rs452036   | A | G | -0.212201  | 0.138969   | 0.358555387 | 0.3565 |
| rs4530754  | A | G | -0.0734193 | 0.110055   | 0.545570052 | 0.558  |
| rs4601790  | G | A | -0.202853  | -0.155338  | 0.271669908 | 0.2515 |
| rs4660293  | G | A | 0.0161236  | 0.0588398  | 0.235487855 | 0.255  |
| rs470113   | G | A | 0.33801    | 0.0687675  | 0.177187291 | 0.1885 |
| rs4728142  | A | G | -0.119776  | -0.0504695 | 0.448524297 | 0.427  |
| rs4746172  | T | C | -0.224334  | -0.0837615 | 0.736929685 | 0.753  |
| rs4823006  | G | A | -0.197275  | -0.090671  | 0.450522423 | 0.4185 |
| rs4952611  | T | C | -0.1895    | -0.1143    | 0.5862      | 0.6005 |
| rs5219     | C | T | -0.409501  | -0.13055   | 0.640862566 | 0.6405 |
| rs5417     | A | C | 0.3207     | 0.2068     | 0.5839      | 0.5985 |
| rs55701159 | T | G | 0.3261     | 0.1928     | 0.8898      | 0.8875 |
| rs55780018 | T | C | -0.3601    | -0.1686    | 0.5568      | 0.564  |
| rs564699   | T | C | -0.149     | 0.0296     | 0.5347      | 0.522  |
| rs6015450  | G | A | 0.756935   | 0.612697   | 0.119969827 | 0.139  |
| rs6081613  | A | G | 0.1769     | -0.0664    | 0.2724      | 0.292  |
| rs6095241  | A | G | -0.25078   | -0.200195  | 0.441583737 | 0.416  |

|            |   |   |           |            |             |        |
|------------|---|---|-----------|------------|-------------|--------|
| rs6108168  | A | C | -0.1761   | -0.1274    | 0.258       | 0.225  |
| rs61760904 | T | C | 1.659     | 0.796369   | 0.007580108 | 0.0065 |
| rs62012628 | T | C | -0.0704   | -0.1474    | 0.2986      | 0.2915 |
| rs62080325 | A | G | -0.1705   | -0.026     | 0.672       | 0.678  |
| rs62104477 | T | G | 0.028     | 0.1484     | 0.33        | 0.3285 |
| rs62270945 | T | C | 0.1149    | -0.2928    | 0.0318      | 0.0245 |
| rs62524579 | A | G | -0.1304   | -0.1398    | 0.5267      | 0.5415 |
| rs6271     | T | C | -0.6199   | -0.504536  | 0.074853423 | 0.0475 |
| rs633185   | C | G | 0.743115  | 0.427773   | 0.714520308 | 0.475  |
| rs6487543  | A | G | 0.2792    | 0.1315     | 0.7716      | 0.762  |
| rs6588634  | T | C | 0.281     | 0.0142     | 0.8957      | 0.9035 |
| rs6595838  | A | G | 0.2358    | 0.131      | 0.2884      | 0.275  |
| rs661348   | C | T | 0.5409    | 0.248208   | 0.417384052 | 0.4315 |
| rs6686889  | T | C | 0.08      | 0.143      | 0.2617      | 0.2585 |
| rs66887589 | T | C | -0.1889   | -0.1399    | 0.5154      | 0.5185 |
| rs6712094  | G | A | -0.65221  | -0.288628  | 0.271541077 | 0.2675 |
| rs6722745  | C | T | 0.0219925 | 0.0338875  | 0.267035533 | 0.268  |
| rs67330701 | T | C | -0.4589   | -0.3138    | 0.0983      | 0.1065 |
| rs6797587  | G | A | 0.389687  | 0.260072   | 0.666281001 | 0.679  |
| rs6825911  | T | C | -0.442523 | -0.267342  | 0.794567552 | 0.794  |
| rs6891344  | G | A | -0.291373 | -0.17967   | 0.178432665 | 0.1815 |
| rs6911827  | T | C | 0.1904    | 0.1393     | 0.4627      | 0.46   |
| rs6969780  | C | G | 0.269091  | 0.230449   | 0.088772874 | 0.0905 |
| rs709209   | G | A | -0.151065 | 0.0733656  | 0.341924447 | 0.552  |
| rs7103648  | G | A | 0.429197  | 0.284818   | 0.387484562 | 0.4005 |
| rs7126805  | A | G | 0.2048    | 0.0204     | 0.7371      | 0.6895 |
| rs7129220  | A | G | 0.627377  | 0.305146   | 0.115472523 | 0.108  |
| rs7178615  | A | G | -0.171    | -0.1522    | 0.3957      | 0.386  |
| rs7236548  | A | C | 0.2517    | -0.0473    | 0.1819      | 0.182  |
| rs7248104  | A | G | -0.321165 | -0.0772576 | 0.417249897 | 0.4065 |

|            |   |   |            |            |             |        |
|------------|---|---|------------|------------|-------------|--------|
| rs72765298 | T | C | -0.4263    | -0.0411    | 0.8851      | 0.876  |
| rs72812846 | A | T | -0.2958    | -0.186     | 0.2717      | 0.2865 |
| rs7302981  | G | A | -0.306399  | -0.228381  | 0.628884456 | 0.611  |
| rs73046008 | A | C | -0.0968    | 0.0763     | 0.7379      | 0.7265 |
| rs740406   | G | A | 0.421657   | -0.0407624 | 0.056547216 | 0.077  |
| rs7406910  | C | T | 0.318041   | 0.100579   | 0.912245709 | 0.9175 |
| rs740698   | T | C | -0.1401    | 0.0296     | 0.5775      | 0.5875 |
| rs743757   | C | G | 0.2611     | 0.1841     | 0.1459      | 0.1395 |
| rs74439044 | T | C | -0.4745    | -0.3807    | 0.9039      | 0.9045 |
| rs745821   | T | G | 0.1961     | 0.1496     | 0.7439      | 0.7245 |
| rs7500448  | A | G | 0.2088     | -0.0853    | 0.7452      | 0.7365 |
| rs7515635  | C | T | -0.263748  | -0.129411  | 0.542327267 | 0.521  |
| rs751984   | C | T | -0.514495  | -0.455674  | 0.113849498 | 0.13   |
| rs7562     | T | C | 0.1818     | 0.0921     | 0.5267      | 0.556  |
| rs757081   | G | C | 0.447886   | 0.145543   | 0.335298335 | 0.3255 |
| rs7592578  | T | G | -0.3505    | -0.2117    | 0.2127      | 0.174  |
| rs76206723 | A | G | -0.2358    | 0.033      | 0.1093      | 0.111  |
| rs76326501 | A | C | 0.6863     | 0.4126     | 0.9119      | 0.9225 |
| rs78378222 | T | G | -0.2218    | -0.7595    | 0.9825      | 0.986  |
| rs78648104 | T | C | -0.3291    | -0.2041    | 0.9119      | 0.922  |
| rs79089478 | T | C | 0.5491     | 0.1571     | 0.9735      | 0.9735 |
| rs79146658 | T | C | 0.1073     | -0.2454    | 0.9174      | 0.902  |
| rs8016306  | A | G | 0.2502     | 0.1434     | 0.7939      | 0.7795 |
| rs805303   | A | G | -0.233844  | -0.169344  | 0.372244148 | 0.3675 |
| rs8059962  | T | C | -0.0898    | -0.1025    | 0.4217      | 0.407  |
| rs8068318  | T | C | 0.34965    | 0.146069   | 0.734149856 | 0.566  |
| rs8258     | T | C | 0.0814     | -0.0943    | 0.366       | 0.365  |
| rs867186   | G | A | 0.00155469 | -0.1409    | 0.087917548 | 0.1145 |
| rs871606   | C | T | -0.289662  | 0.302018   | 0.104090657 | 0.104  |
| rs880315   | C | T | 0.500876   | 0.241354   | 0.340373504 | 0.3645 |





| Genetic risk scores of preterm infants were calculated as the average of SBP and DBP genetic risk scores. |                          |                    |                    |                                 |                                                                           |                    |
|-----------------------------------------------------------------------------------------------------------|--------------------------|--------------------|--------------------|---------------------------------|---------------------------------------------------------------------------|--------------------|
| <b>Example:</b>                                                                                           |                          |                    |                    |                                 |                                                                           |                    |
| rsID                                                                                                      | Effect allele            | SBP-beta in adults | DBP-beta in adults | Genotype infant A               | SBP-beta infant A                                                         | DBP-beta infant A  |
| rs10078021                                                                                                | T                        | -0.0474            | -0.1051            | TT                              | -0.0948                                                                   | -0.2102            |
| rs1008058                                                                                                 | A                        | 0.256116           | 0.185098           | AG                              | 0.256116                                                                  | 0.185098           |
| rs10164833                                                                                                | G                        | 0.0167674          | 0.0529545          | CC                              | 0                                                                         | 0                  |
|                                                                                                           |                          |                    |                    | continue with all other SNPs... |                                                                           |                    |
|                                                                                                           |                          |                    |                    | Sum of all beta-values          | 0.161316                                                                  | -0.025102          |
|                                                                                                           |                          |                    |                    |                                 | Cumulated SBP-beta                                                        | Cumulated DBP-beta |
|                                                                                                           |                          |                    |                    |                                 |                                                                           |                    |
|                                                                                                           |                          |                    |                    |                                 | $(0.161316 + (-0.025102))/2 = \text{gsBP infant A}$                       |                    |
|                                                                                                           |                          |                    |                    |                                 | Cumulated beta values of 5580 infants are given in supplementary figure 2 |                    |
|                                                                                                           |                          |                    |                    |                                 | 0.068107 = cumulated beta (gsBP) infant A                                 |                    |
| Abbreviations:                                                                                            |                          |                    |                    |                                 |                                                                           |                    |
| SBP                                                                                                       | Systolic blood pressure  |                    |                    |                                 |                                                                           |                    |
| DBP                                                                                                       | Diastolic blood pressure |                    |                    |                                 |                                                                           |                    |
| EAF                                                                                                       | Effect allele frequency  |                    |                    |                                 |                                                                           |                    |
