# Supplementary material for: Genetic background of high blood pressure is associated with reduced mortality in premature neonates
Source: PubMed Central journal article supplement — Arch Dis Child Fetal Neonatal Ed. 2019 Jun 14;105(2):184–9. doi: 10.1136/archdischild-2019-317131 (PMC7063394; doi:10.1136/archdischild-2019-317131), 2019-06-14
Supplement: fetalneonatal-2019-317131supp004.pdf [file fetalneonatal-2019-317131supp004.pdf]

**Supplementary Table S2:** Clinical risk factors for low blood pressure and treatment with catecholamines

|                                                                                      | Clinical risk factors |                 |                   |                  | Total              |
|--------------------------------------------------------------------------------------|-----------------------|-----------------|-------------------|------------------|--------------------|
|                                                                                      | no                    | no              | yes               | yes              |                    |
| <b>Mechanical ventilation on the first day of life</b>                               |                       |                 |                   |                  |                    |
| <b>Additional risks (no antenatal steroids, multiple birth, emergency-C-section)</b> | no                    | yes             | no                | yes              |                    |
| <b>Number of infants</b>                                                             | 1965                  | 1256            | 1366              | 983              | 5570               |
| <b>Gestational age [weeks]</b>                                                       | 28.8 ± 1.9            | 29.2 ± 1.9      | 27.0 ± 2.2        | 27.1 ± 2.2       | 28.2 ± 2.2         |
| <b>Lowest mean blood pressure on the first day of life [mm Hg]</b>                   | 29.7 ± 6.1            | 29.3 ± 5.9      | 25.5 ± 5.7        | 24.3 ± 5.7       | 27.6 ± 6.3         |
| <b>Treatment with catecholamines [%]</b>                                             | 134/1965 (6.8 %)      | 96/1256 (7.6 %) | 457/1366 (33.5 %) | 400/983 (40.7 %) | 1087/5570 (19.5 %) |

**Supplementary Table S3:** Treatment with catecholamines stratified to genetic score blood pressure (gsBP)

|                          | Genetic score blood pressure        |                                              |                                      | p*   |
|--------------------------|-------------------------------------|----------------------------------------------|--------------------------------------|------|
|                          | Low<br>(< 25. Percentile)<br>n=1395 | Intermediate<br>(Percentile 25-75)<br>n=2790 | High<br>(> 75. Percentile)<br>n=1395 |      |
| <b>Epinephrine</b>       | 91/1395 (6.5%)                      | 149/2790 (5.3%)                              | 65/1395 (4.7%)                       | 0.04 |
| <b>Norepinephrine</b>    | 76/1395 (5.4%)                      | 154/2790 (5.5%)                              | 77/1395 (5.5%)                       | 1.00 |
| <b>Dopamine</b>          | 139/1395 (10.0%)                    | 280/2790 (10.0%)                             | 114/1395 (8.2%)                      | 0.11 |
| <b>Dobutamine</b>        | 154/1395 (11.0%)                    | 315/2790 (11.3%)                             | 155/1395 (11.1%)                     | 1.00 |
| <b>Any catecholamine</b> | 291/1395 (20.9%)                    | 544/2790 (19.5%)                             | 261/1395 (18.7%)                     | 0.17 |

\* Two sided p-value comparing groups with low vs. high gsBP. Fisher's exact test was used to compare variables.
